# Supplementary material
Source: publisher figshare collection journal article supplement (https://acs.figshare.com/ndownloader/files/9485983)
Supplement: Supplementary file 1 [file 9485983]

## Supporting Information

### **Oligomerization of Biomass-Derived Light Olefins to Liquid Fuel: Effect of Alkali Treatment on the HZSM-5 Catalyst**

**Xiaoxing Wang\*<sup>1</sup>, Xiaoyan Hu<sup>1</sup>, Chunshan Song\*<sup>1,2</sup>, Kenneth Lux<sup>3</sup>, Mehdi Namazian<sup>3</sup>,  
Tahmina Imam<sup>3</sup>**

<sup>1</sup> Clean Fuels and Catalysis Program, PSU-DUT Joint Center for Energy Research, EMS Energy Institute and Department of Energy & Mineral Engineering, the Pennsylvania State University, 209 Academic Projects Building, University Park, PA 16802, USA.

<sup>2</sup> Department of Chemical Engineering, the Pennsylvania State University, University Park, PA 16802, USA.

<sup>3</sup> Altex Technologies Corporation, 244 Sobrante Way, Sunnyvale, CA 94086, USA

\*E-mail: [csong@psu.edu](mailto:csong@psu.edu) (CS), Tel: 814-863-4466, Fax: 814-865-3573; [xxwang@psu.edu](mailto:xxwang@psu.edu) (XW)

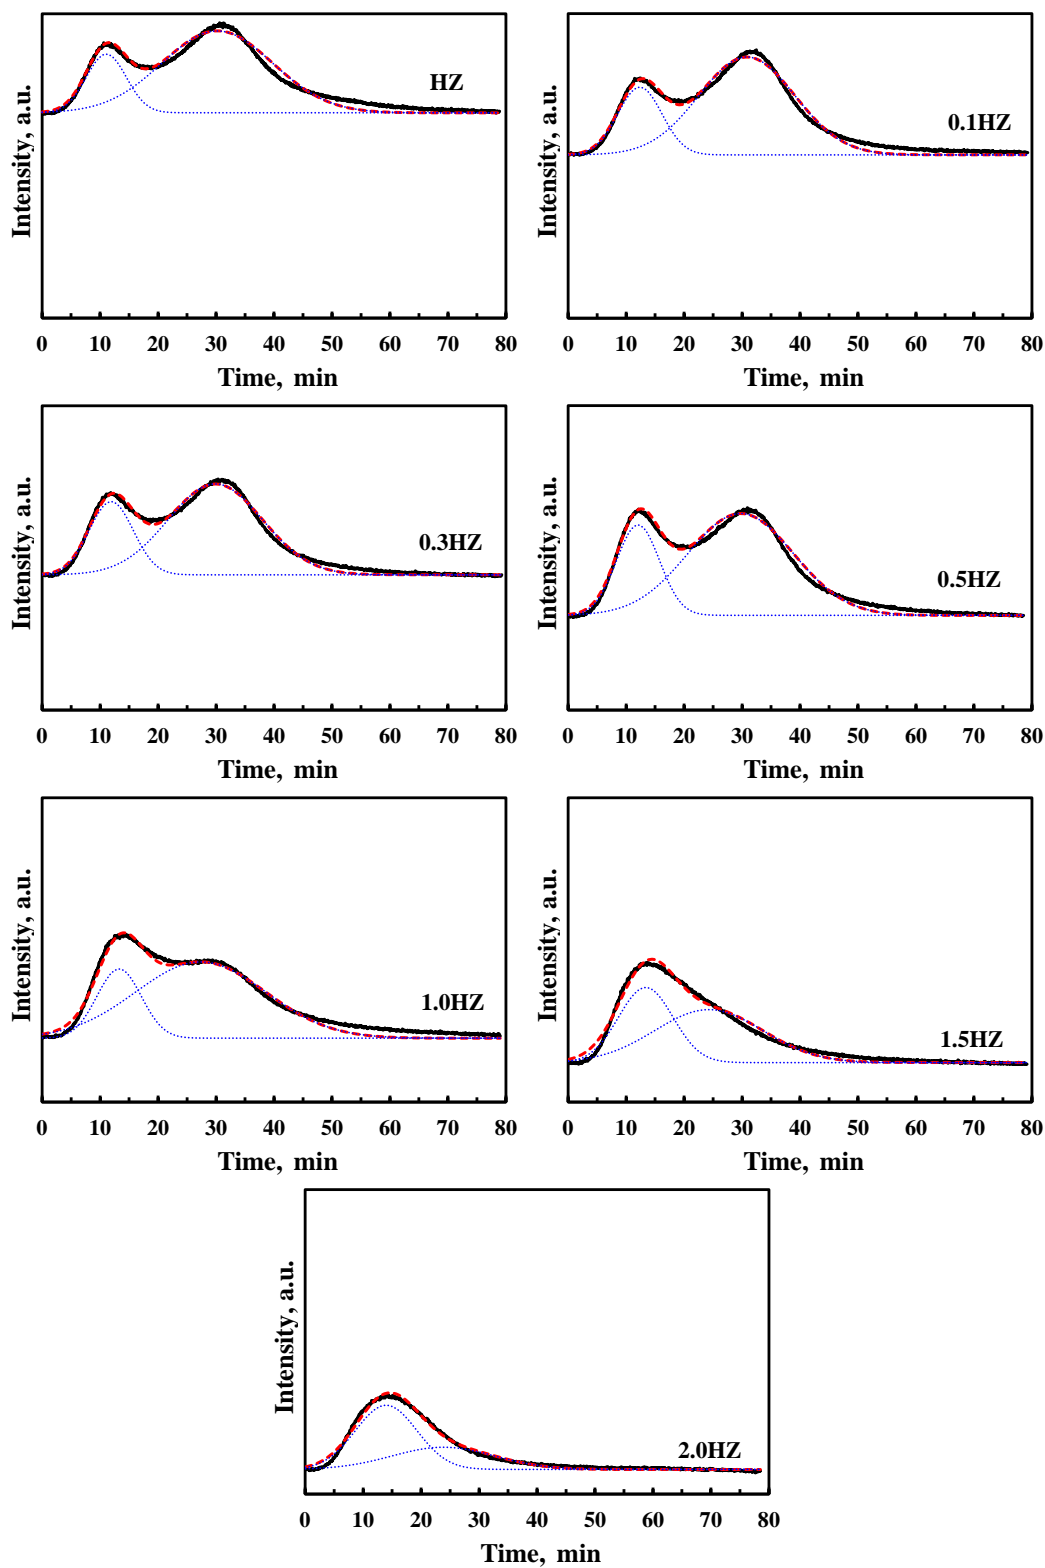

**Figure S1.** The peak deconvolution of  $\text{NH}_3$ -TPD profiles over HZ, 0.1HZ, 0.3HZ, 0.5HZ, 1.0HZ, 1.5HZ, and 2.0HZ catalysts.

**Table S1.** The chemical composition of HZ and 0.1HZ before and after 1M HCl treatment analyzed by ICP-AES.

| Sample              | Al <sub>2</sub> O <sub>3</sub> (wt%) | SiO <sub>2</sub> (wt%) | SiO <sub>2</sub> /Al <sub>2</sub> O <sub>3</sub> molar ratio |
|---------------------|--------------------------------------|------------------------|--------------------------------------------------------------|
| HZ                  | 2.17                                 | 88.9                   | 55.8                                                         |
| 0.1HZ               | 2.77                                 | 90.5                   | 55.5                                                         |
| HZ – HCl treated    | 2.66                                 | 88.5                   | 56.6                                                         |
| 0.1HZ – HCl treated | 2.55                                 | 86.1                   | 57.4                                                         |
